# Supplementary material for: A Panel of Serum Biomarkers Differentiates IgA Nephropathy from Other Renal Diseases
Source: PubMed Central journal article supplement (PMC4032235; doi:10.1371/journal.pone.0098081), 2014-05-23
Supplement: pone.0098081.s001.pdf [file pone.0098081.s001.pdf]

**Table S1.** Serum levels of biomarkers in high-proteinuria and low-proteinuria CKD control subgroups

|                              | <b>High-Proteinuria<br/>(N = 37)</b> | <b>Low-Proteinuria<br/>(N =42)</b> |
|------------------------------|--------------------------------------|------------------------------------|
| IgA (mg/ml)                  | 2.72 ± 0.83                          | 2.69 ± 1.17                        |
| Gd-IgA1 (Units/ml)           | 162.6 ± 56.6                         | 143.0 ± 58.7                       |
| Gd-IgA1-specific IgG (Units) | 1.44 ± 0.10                          | 1.47 ± 0.20                        |
| Gd-IgA1-specific IgA (Units) | 0.411 ± 0.146                        | 0.555 ± 0.612                      |

Values are mean ± SD

High-Proteinuria subgroup, urinary protein/creatinine ratio ≥ 2.5g/g

Low-Proteinuria subgroup, urinary protein/creatinine ratio < 2.5g/g
